# Supplementary material for: Exploring the Role of KIR2DS4 and HLA-A*02:07 in Predicting Chemotherapy Sensitivity and Erythrocytopenia in Nasopharyngeal Carcinoma
Source: Research Square preprint supplement (doi:10.21203/rs.3.rs-5963730/v1), 2025-02-11
Supplement: Supplementary file 1 [file ac989cf691af0b8de5486701.docx]

Primers Used in the Research

Table 6-1 *KIR* genes sequence specific primers

| *KIR* Genes | Primer | Sequence (5'-3') | Product Length (bp) |
| --- | --- | --- | --- |
| 1_2DL1_F1 | F1 | CTT GCT CAG ATG TCA TGT TTG AA |  |
| 1_2DL1_R1 | R1 | GGT CCC TGC CAG GTC TTG CG | 146 |
| 2_2DL1_F2 | F2 | TGG ACC AAG AGT CTG CAG GA |  |
| 2_2DL1_R2 | R2 | TGT TGT CTC CCT AGA AGA CG | 300 |
| 3_2DL2_F1 | F1 | CTG GCC CAC CCA GGT CG |  |
| 3_2DL2_R1 | R1 | GGA CCG ATG GAG AAG TTG GCT | 173 |
| 4_2DL2_F2 | F2 | GAG GGG GAG GCC CAT GAA T |  |
| 4_2DL2_R2 | R2 | TCG AGT TTG ACC ACT CGT AT | 151 |
| 5_2DL3_F1 | F1 | CTT CAT CGC TGG TGC TG |  |
| 5_2DL3_R1 | R1 | AGG CTC TTG GTC CAT TAC AA | 550 |
| 6_2DL3_F2 | F2 | TCC TTC ATC GCT GGT GCT G |  |
| 6_2DL3_R2 | R2 | GGC AGG AGA CAA CTT TGG ATC A | 800 |
| 7_2DL4_F1 | F1 | CAG GAC AAG CCC TTC TGC |  |
| 7_2DL4_R1 | R1 | CTG GGT GCC GAC CAC T | 254 |
| 8_2DL4_F2 | F2 | ACC TTC GCT TAC AGC CCG |  |
| 8_2DL4_R2 | R2 | CCT CAC CTG TGA CAG AAA CAG | 288 |
| 9_2DS2_F1 | F1 | TTC TGC ACA GAG AGG GGA AGT A |  |
| 9_2DS2_R1 | R1 | GGG TCA CTG GGA GCT GAC AA | 175 |
| 10_2DS2_F2 | F2 | CGG GCC CCA CGG TTT |  |
| 10_2DS2_R2 | R2 | GGT CAC TCG AGT TTG ACC ACT CA | 240 |
| 11_2DS3_F1 | F1 | TGG CCC ACC CAG GTC G |  |
| 11_2DS3_R1 | R1 | TGA AAA CTG ATA GGG GGA GTG AGG | 242 |
| 12_2DS3_F2 | F2 | CTA TGA CAT GTA CCA TCT ATC CAC |  |
| 12_2DS3_R2 | R2 | AAG CAG TGG GTC ACT TGA C | 190 |
| 13_2DS4_F1 | F1 | CTG GCC CTC CCA GGT CA |  |
| 13_2DS4_R1 | R1 | TCT GTA GGT TCC TGC AAG GAC AG | 204 |
| 14_2DS4_F2 | F2 | GTT CAG GCA GGA GAG AAT |  |
| 14_2DS4_R2 | R2 | GTT TGA CCA CTC GTA GGG AGC | 197/279 |
| 15_2DS5_F1 | F1 | TGA TGG GGT CTC CAA GGG |  |
| 15_2DS5_R1 | R1 | TCC AGA GGG TCA CTG GGC | 126 |
| 16_2DS5_F2 | F2 | ACA GAG AGG GGA CGT TTA ACC |  |
| 16_2DS5_R2 | R2 | ATG TCC AGA GGG TCA CTG GG | 126 |
| 17_3DL1_F1 | F1 | CGC TGT GGT GCC TCG A |  |
| 17_3DL1_R1 | R1 | GGT GTG AAC CCC GAC ATG | 191 |
| 18_3DL1_F2 | F2 | CCC TGG TGA AAT CAG GAG AGA G |  |
| 18_3DL1_R2 | R2 | TGT AGG TCC CTG CAA GGG CAA | 186 |
| 19_3DS1_F1 | F1 | AGC CTG CAG GGA ACA GAA G |  |
| 19_3DS1_R1 | R1 | GCC TGA CTG TGG TGC TCG | 300 |
| 20_3DS1_F2 | F2 | CCT GGT GAA ATC AGG AGA GAG |  |
| 20_3DS1_R2 | R2 | GTC CCT GCA AGG GCA C | 180 |
| 21_3DL2_F1 | F1 | CAA ACC CCT GTC TGC CC |  |
| 21_3DL2_R1 | R1 | GTG CCG ACC ACC CAG TGA | 211 |
| 22_3DL2_F2 | F2 | CCC ATG AAC GTA GGC TCC G |  |
| 22_3DL2_R2 | R2 | CAC ACG CAG GGC AGG G | 130 |
| 23_3DL3_F1 | F1 | GTC AGG ACA AGC CCT TCC TC |  |
| 23_3DL3_R1 | R1 | GAG TGT GGG TGT GAA CTG CA | 232 |
| 24_3DL3_F2 | F2 | TTC TGC ACA GAG AGG GGA TCA |  |
| 24_3DL3_R2 | R2 | GAG CCG ACA ACT CAT AGG GTA | 165 |
| 25_2DL5_F1 | F1 | GCG CTG TGG TGC CTC G |  |
| 25_2DL5_R1 | R1 | GAC CAC TCA ATG GGG GAG C | 214 |
| 26_2DL5_F2 | F2 | TGC AGC TCC AGG AGC TCA |  |
| 26_2DL5_R2 | R2 | GGG TCT GAC CAC TCA TAG GGT | 191 |
| 27_2DP1_F1 | F1 | GTC TGC CTG GCC CAG CT |  |
| 27_2DP1_R1 | R1 | GTG TGA ACC CCG ACA TCT GTA C | 205 |
| 28_2DP1_F2 | F2 | CCA TCG GTC CCA TGA TGG |  |
| 28_2DP1_R2 | R2 | CAC TGG GAG CTG ACA ACT GAT G | 89 |
| 29_2DS1_F1 | F1/F2/R3 | CTT CTC CAT CAG TCG CAT GM |  |
| 29_2DS1_F2 |  | AGA GGG TCA CTG GGA GCT GAC | 102 |
| 29_2DS1_R3 |  | CTT CTC CAT CAG TCG CAT GAG |  |
| 30_IC_F |  | TGC CAA GTG GAG CAC CCA A |  |
| 30_IC_R |  | GCA TCT TGC TCT GTG CAG AT | 796 |

Table 6-2 Amplification primers and sequencing primers of HLA-A exons 2 and 3

| HLA-A | Direction | Primer Name | Position | Sequence (5'-3') | |
| --- | --- | --- | --- | --- | --- |
| Amplification Primer | Forward | 5A.1 | 5’UTR to Exon 1 | CCC AGA CGC CGA GGA TGR CSG | |
| Reverse | 3A.1 | Intron 3 | GCA GGG CGG AAC CTC AGA GTC ACT CTC T |
| Sequencing Primer | Forward | INT2R | Intron 2 | GGA TCT CGG ACC CGG AG |
| Reverse | 5AE3.2 | Intron 2 | GTT TAG GCC AAA AAT YCC CC |
